# Supplementary material for: Allergy and immunology in young children of Japan: The JECS cohort
Source: PubMed Central journal article supplement (PMC7652713; doi:10.1016/j.waojou.2020.100479), 2020-11-07

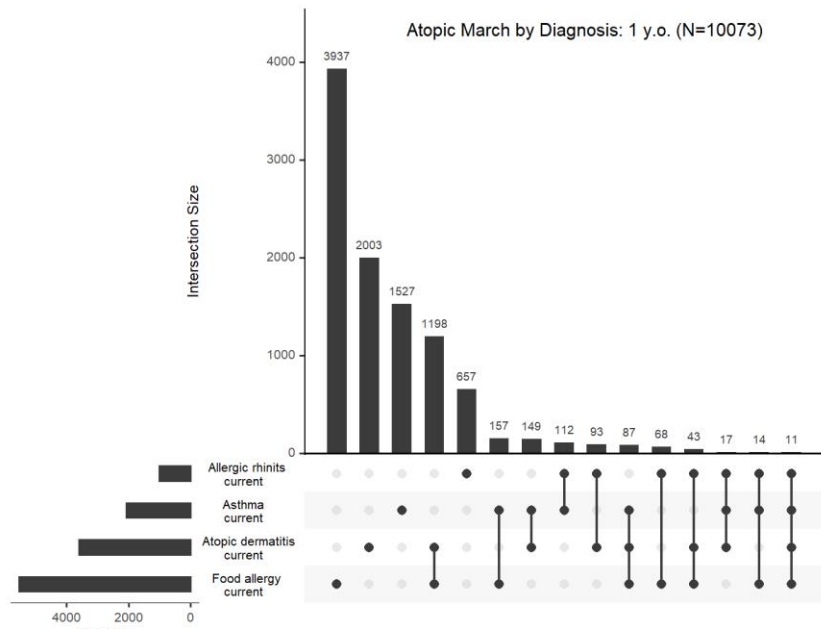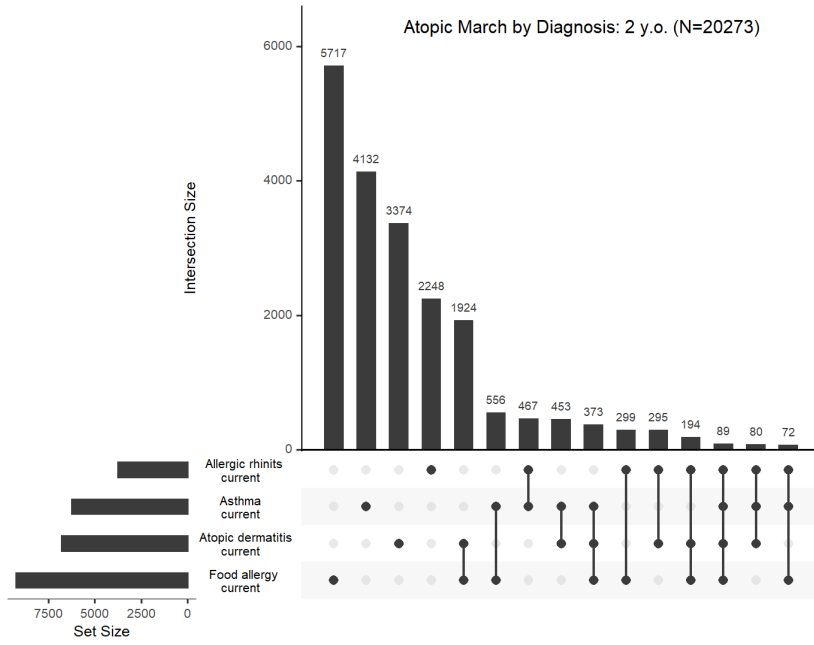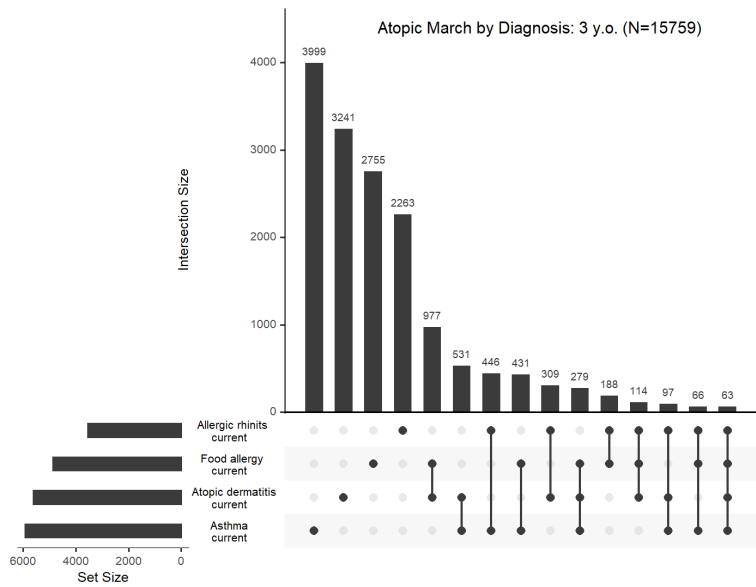

Supplement: mmc2.pdf [file mmc2.pdf]
