# Supplementary material for: Allergy and immunology in young children of Japan: The JECS cohort
Source: PubMed Central journal article supplement (PMC7652713; doi:10.1016/j.waojou.2020.100479), 2020-11-07

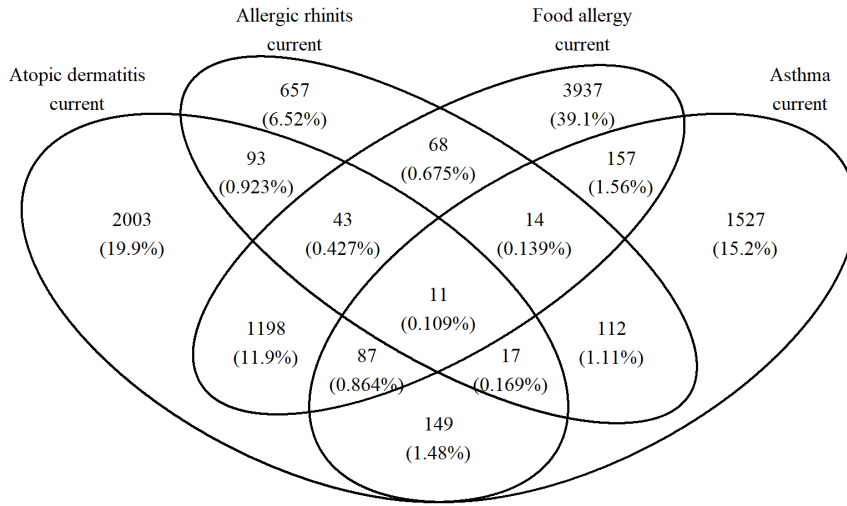

Atopic March by Diagnosis: 2 y.o. (N=20273)

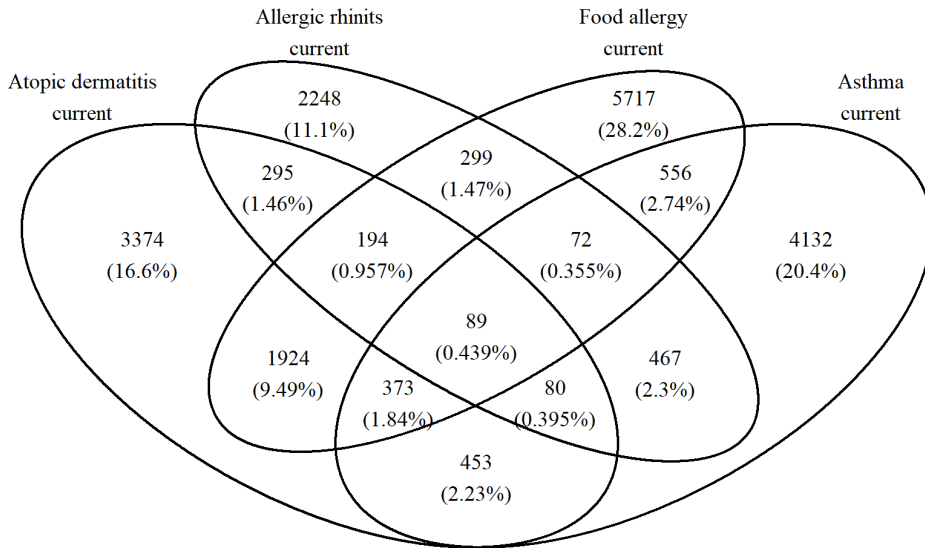

Atopic March by Diagnosis: 3 y.o. (N=15759)

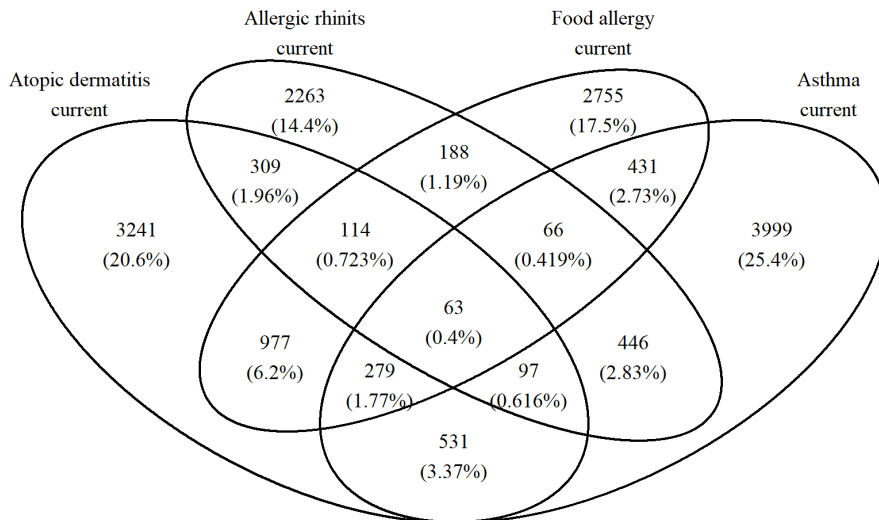

Supplement: mmc3.pdf [file mmc3.pdf]
